# Supplementary material for: Evidence for selection on synonymous mutations affecting stability of mRNA secondary structure in mammals
Source: Springer Nature journal article supplement (doi:10.1186/gb-2005-6-9-r75), 2005-08-16
Supplement: Additional file 10 [file gb-2005-6-9-r75-s10.doc]

Relationships between the proportion of base-paired sites in mouse coding sequence and rates of evolution for short genes

| Site | *K*a |  |  | *K*s |  |  |
| --- | --- | --- | --- | --- | --- | --- |
|  | Mean ± SEM |  | *P* | Mean ± SEM |  | *P* |
| CDS | 0.0105 ±0.0019 | 0.14 | 0.42 | 0.0683 ±0.0048 | 0.41 | 0.01 |
| Base-paired | 0.0097 ±0.0019 | 0.22 | 0.21 | 0.0562 ± 0.0052 | 0.57 | <0.01 |
| Unpaired | 0.0127 ±0.0030 | –0.08 | 0.67 | 0.0895 ± 0.0124 | –0.09 | 0.60 |

N=35. *K*a=non-synonymous substitution rate, *K*s= synonymous substitution rate. =Spearman rank correlation coefficient.
